# Supplementary material for: Applicability of a Modified Rat Model of Acute Arthritis for Long-Term Testing of Drug Delivery Systems
Source: MDPI journal article supplement (doi:10.3390/pharmaceutics11020070), 2019-02-07
Supplement: s1 [file s1]

Supplementary Materials:

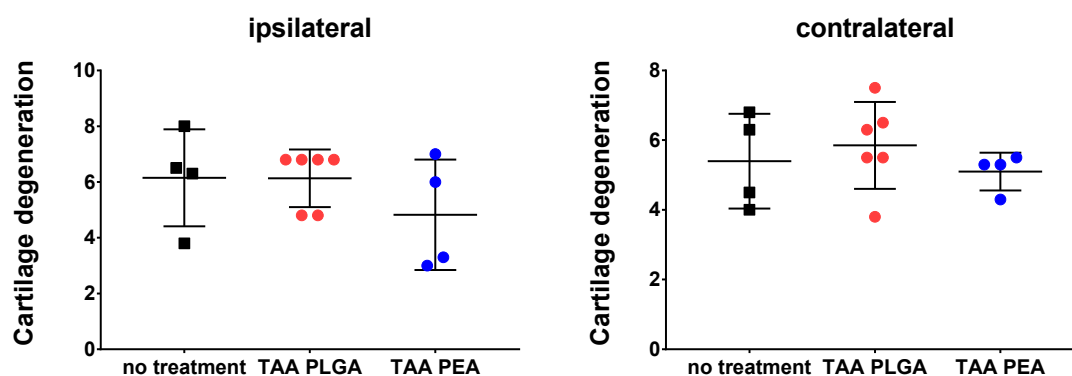

**Figure S1.** Cartilage degeneration of affected knee joint (left panel) and contralateral knee joint (right panel) was quantified by Mankin scoring of knee joints treated with a single intra-articular injection of TAA-loaded PLGA microspheres (red) or TAA-loaded PEA microspheres (blue) and compared with untreated knee joints (no treatment). Data are presented as mean  $\pm$  SD.
